# Supplementary material for: High Prevalence of Novel Sequence Types in Streptococcus pneumoniae That Caused Invasive Diseases in Kuwait in 2018
Source: MDPI journal article supplement (doi:10.3390/microorganisms12010225), 2024-01-22
Supplement: s1 [file microorganisms-2827980-supplementary.xlsx]

## Sheet: Sheet1
	Table S1. Antimicrobial susceptibility of S. pneumoniae isolates
	Specimen no.	Serotype	Sequence type (ST)	Penicillin			Erythromycin		Azithromycin		Amoxicillin		Amoxycillin-Clavulanic acid		Cefotaxime			Ceftriaxone			Tetracycline		Trimethoprim-Sulfamethoxole		Chloramphenicol		Vancomycin		Levofloxacin		Moxifloxacin		Meropenem		Clindamycin
				Meningitis	Non-meningitis	MIC									Meningitis	Non-meningitis	MIC	Meningitis	Non-meningitis	MIC
	1949	9N	17479a	Rb	Sc	1	R	8	R	12	S	0.75	S	1	I	S	0.75	S	S	0.5	R	24	S	0.38	S	1.5	S	0.25	S	0.25	S	0.047	S	0.19	S	0.094
	1963	9V	17466a	S	S	0.016	S	0.064	S	0.38	S	0.016	S	0.016	S	S	0.016	S	S	0.016	S	0.19	S	0.25	S	3	S	0.38	S	0.75	S	0.125	S	0.006	S	0.094
	1964	28A	17474a	S	S	0.012	S	0.023	S	0.19	S	0.016	S	0.016	S	S	0.125	S	S	0.094	S	0.25	S	0.125	S	2	S	0.19	S	0.75	S	0.19	S	0.004	S	0.125
	1967	33D	473	R	S	0.19	S	0.19	Ie	1.5	S	0.064	S	0.064	S	S	0.125	S	S	0.125	S	0.5	S	0.125	S	2	S	0.38	S	0.75	S	0.094	S	0.012	S	0.032
	1968	9N	517	S	S	0.016	S	0.032	S	0.125	S	0.016	S	0.016	S	S	0.016	S	S	0.016	S	0.38	S	0.125	S	2	S	0.38	S	0.5	S	0.064	S	0.003	S	0.016
	1998	19F	17348	R	NAd	4	R	256	R	256	S	2	S	1.5	I	NA	1	I	NA	0.75	R	32	S	0.094	S	2	S	0.25	S	0.5	S	0.064	I	0.38	R	256
	2005	12F	989	S	S	0.047	R	2	R	256	S	0.047	S	0.032	S	S	0.064	S	S	0.032	R	12	S	0.25	S	2	S	0.38	S	1	S	0.19	S	0.064	S	0.25
	2006	15A	17483a	R	S	0.19	R	12	R	24	S	0.125	S	0.25	S	S	0.25	S	S	0.125	S	0.25	S	0.19	S	3	S	0.38	S	0.5	S	0.094	S	0.125	S	0.25
	2017	24F	230	R	S	0.38	R	24	R	256	S	0.064	S	0.064	S	S	0.25	S	S	0.19	R	8	I	0.75	S	1.5	S	0.38	S	0.5	S	0.047	S	0.125	S	0.25
	2018	15A	7340	R	S	0.19	R	256	R	256	S	0.19	S	0.19	S	S	0.19	S	S	0.125	I	4	I	2	S	4	S	1	S	1	S	0.125	S	0.064	R	256
	2028	19A	17471a	R	S	0.75	R	2	R	24	S	0.75	S	0.75	I	S	1	I	S	0.75	S	0.125	I	1.5	S	1.5	S	0.125	S	0.5	S	0.064	R	1	S	0.094
	2040	8	53	S	S	0.032	S	0.047	S	0.38	S	0.016	S	0.016	S	S	0.023	S	S	0.016	S	0.19	S	0.19	S	1.5	S	0.25	S	0.25	S	0.047	S	0.016	S	0.125
	2050	22A	17470a	R	S	0.125	S	0.032	I	0.75	S	0.19	S	0.125	S	S	0.064	S	S	0.064	S	0.094	I	0.75	S	1	S	0.25	S	0.38	S	0.047	S	0.064	S	0.032
	2055	18C	1233	R	S	0.125	R	2	R	12	S	0.75	S	0.25	S	S	0.38	S	S	0.5	R	24	R	4	S	1.5	S	0.38	S	0.75	S	0.064	S	0.064	S	0.125
	2070	22A	17481a	S	S	0.047	S	0.094	I	1	S	0.023	S	0.016	S	S	0.125	S	S	0.125	S	0.38	R	4	S	2	S	0.25	S	0.5	S	0.064	S	0.047	S	0.094
	2076	23A	17771a	R	S	1.5	R	6	R	64	S	1	S	1.5	I	S	1	I	S	1	S	0.25	S	0.125	S	1.5	S	0.19	S	32	I	2	I	0.38	S	0.032
	2080	6C	1390	R	S	1	R	6	R	32	S	1	S	1	I	S	0.75	I	S	0.75	S	0.25	S	0.19	S	2	S	0.25	S	0.75	S	0.047	I	0.38	S	0.064
	2087	34F	17776a	R	S	0.38	R	4	R	>256	S	0.5	S	0.19	S	S	0.094	S	S	0.125	S	0.38	I	0.75	S	4	S	0.25	S	1	S	0.125	S	0.19	R	256
	2093	29	17488a	R	NA	0.5	S	0.064	I	1	S	1.5	S	1	I	NA	0.75	I	NA	0.75	S	0.19	S	0.125	S	1.5	S	0.19	S	0.75	S	0.064	I	0.38	S	0.094
	2102	23A	17771a	R	NA	1	R	6	R	16	S	1.5	S	1	I	NA	1	I	NA	1	S	0.125	S	0.125	S	2	S	0.5	S	1.5	S	0.125	I	0.38	S	0.125
	2111	35F	17476a	R	S	0.125	S	0.047	S	0.25	S	0.5	S	0.38	S	S	0.019	S	S	0.094	S	0.19	S	0.094	S	1.5	S	0.25	S	0.75	S	0.094	S	0.19	S	0.094
	2112	6C/6D	1390	R	NA	1	R	3	R	24	S	0.75	S	1	I	NA	0.75	S	NA	0.38	S	0.094	S	0.125	S	1.5	S	0.19	S	0.75	S	0.047	S	0.19	S	0.047
	2116	19A	17468a	S	S	0.016	S	0.023	S	0.19	S	0.016	S	0.016	S	S	0.023	S	S	0.016	S	0.19	I	2	S	1.5	S	0.25	S	32	S	0.5	S	0.006	S	0.032
	2117	6C/6D	1390	R	S	0.75	R	6	R	48	S	1	S	0.75	I	S	0.75	S	S	0.5	S	0.38	S	0.094	S	1.5	S	0.25	S	1	S	0.064	S	0.25	S	0.064
	2122	11A	2685	S	S	0.047	S	0.064	I	1	S	0.064	S	0.047	S	S	0.047	S	S	0.064	S	0.125	S	0.38	S	2	S	0.25	S	1	S	0.064	S	0.032	S	0.064
	2126	23B	8959	R	S	0.094	S	0.047	S	0.38	S	0.094	S	0.094	S	S	0.064	S	S	0.064	S	0.125	S	0.19	S	1.5	S	0.25	S	1	S	0.094	S	0.047	S	0.064
	2127	23B	1373	S	S	0.047	S	0.032	S	0.19	S	0.047	S	0.064	S	S	0.094	S	S	0.016	S	0.094	I	1	S	1	S	0.25	S	0.5	S	0.047	S	0.032	S	0.125
	2128	8	17484a	S	S	0.016	S	0.094	I	0.75	S	0.016	S	0.016	S	S	0.023	S	S	0.016	S	0.064	S	0.25	S	2	S	0.19	S	0.75	S	0.094	S	0.008	S	0.125
	2129	29	1982	R	S	0.25	R	4	R	16	S	0.5	S	0.75	S	S	0.25	S	S	0.25	S	0.064	S	0.064	S	1	S	0.19	S	0.38	S	0.032	S	0.19	S	0.032
	2133	1	618	S	S	0.016	S	0.047	S	0.25	S	0.016	S	0.016	S	S	0.032	S	S	0.023	S	0.094	I	3	S	2	S	0.25	S	0.75	S	0.064	S	0.006	S	0.064
	2134	17F	17485a	S	S	0.016	R	6	R	48	S	0.016	S	0.023	S	S	0.023	S	S	0.016	S	0.094	S	0.125	S	1.5	S	0.19	S	0.5	S	0.047	S	0.008	S	0.125
	a New ST
	b Resistant
	c Susceptible
	d Not applicable
	e Intermediate resistant
